# Supplementary material for: Low pH alleviated salinity stress of ginger seedlings by enhancing photosynthesis, fluorescence, and mineral element contents
Source: PeerJ. 2021 Feb 11;9:e10832. doi: 10.7717/peerj.10832 (PMC7882138; doi:10.7717/peerj.10832)
Supplement: Supplemental Information 1 [file peerj-09-10832-s001.xlsx]

## Sheet: Photosynthesis
Ci	Ci					Ci	AVG	significance at the 5% level		Ci
T1	210	224	216	216.667	7.02377	T1	216.667	c		T1	216.667	7.02377	c
T2	209	215	223	215.667	7.02377	T2	215.667	c		T2	215.667	7.02377	c
T3	250	258	265	257.667	7.50555	T3	257.667	a		T3	257.667	7.50555	a
T4	240	230	236	235.333	5.03322	T4	235.333	b		T4	235.333	5.03322	b
gs	gs			#DIV/0!	#DIV/0!	gs				gs
T1	209	220	215	214.667	5.50757	T1	214.667	b		T1	232	7.81025	a
T2	236	223	237	232	7.81025	T2	232	a		T2	214.667	5.50757	b
T3	159	160	155	158	2.64575	T3	158	c		T3	133	6	d
T4	139	133	127	133	6	T4	133	d		T4	158	2.64575	c
A	A			#DIV/0!	#DIV/0!	A				A		#DIV/0!
T1	11.6	11.7	11.7	11.6667	0.057735	T1	11.6667	a		T1	11.9333	0.152753	a
T2	12.1	11.9	11.8	11.9333	0.152753	T2	11.9333	a		T2	11.6667	0.057735	a
T3	8.6	9.2	8.9	8.9	0.3	T3	8.9	b		T3	6.3	0.264575	c
T4	6.2	6.6	6.1	6.3	0.264575	T4	6.3	c		T4	8.9	0.3	b
E	E			#DIV/0!	#DIV/0!	E				E		#DIV/0!
T1	3.31	3.35	3.33	3.33	0.02	T1	3.33	b		T1	3.4133	0.0305505	a
T2	3.44	3.42	3.38	3.41333	0.0305505	T2	3.4133	a		T2	3.33	0.02	b
T3	3	3.01	2.95	2.98667	0.0321455	T3	2.9867	c		T3	2.8267	0.0416333	d
T4	2.84	2.86	2.78	2.82667	0.0416333	T4	2.8267	d		T4	2.9867	0.0321455	c
WUE	WUE			#DIV/0!	#DIV/0!	WUE				WUE		#DIV/0!
T1	35.0453	34.9254	35.1351	35.0353	0.105241	T1	3.5035	a		T1	34.9603	0.194257	a
T2	35.1744	34.7953	34.9112	34.9603	0.194257	T2	3.496	a		T2	35.0353	0.105241	a
T3	28.6667	30.5648	30.1695	29.8003	1.00146	T3	2.98	b		T3	22.2835	0.689423	c
T4	21.831	23.0769	21.9424	22.2835	0.689423	T4	2.2283	c		T4	29.8003	1.00146	b
Ls	Ls					Ls				Ls
T1	0.348029	0.300437	0.321821	0.323429	0.0238364	T1	0.323429	a		T1	0.323429	0.0238364	a
T2	0.349315	0.326441	0.299623	0.325126	0.024872	T2	0.325126	a		T2	0.325126	0.024872	a
T3	0.213589	0.189698	0.161923	0.188404	0.0258575	T3	0.188404	c		T3	0.188404	0.0258575	c
T4	0.251637	0.270305	0.251744	0.257895	0.010747	T4	0.257895	b		T4	0.257895	0.010747	b

## Sheet: Fluorescence
Fv/Fm	Fv/Fm			AVG	SD	Fv/Fm			Fv/Fm
T1	0.784314	0.788462	0.776699	0.783158	0.0059658	T1	0.7832	a	T1	0.7845	0.0113833	a
T2	0.793499	0.78828	0.771698	0.784492	0.0113833	T2	0.7845	a	T2	0.7832	0.0059658	a
T3	0.734694	0.723711	0.733888	0.730764	0.00612134	T3	0.7308	b	T3	0.709	0.00651758	c
T4	0.702273	0.709302	0.715294	0.708956	0.00651758	T4	0.709	c	T4	0.7308	0.00612134	b
qP	qP			#DIV/0!	#DIV/0!	qP			qP
T1	0.740909	0.761261	0.764151	0.75544	0.0126672	T1	0.7554	a	T1	0.7627	0.00281135	a
T2	0.763158	0.765217	0.759657	0.762677	0.00281135	T2	0.7627	a	T2	0.7554	0.0126672	a
T3	0.713542	0.704918	0.689655	0.702705	0.0120961	T3	0.7027	b	T3	0.6643	0.0171551	c
T4	0.65035	0.683453	0.659091	0.664298	0.0171551	T4	0.6643	c	T4	0.7027	0.0120961	b
NPQ	NPQ			#DIV/0!	#DIV/0!	NPQ			NPQ
T1	0.961538	0.969697	1.01172	0.980985	0.0269272	T1	0.981	c	T1	0.9726	0.00911292	c
T2	0.981061	0.973881	0.962963	0.972635	0.00911292	T2	0.9726	c	T2	0.981	0.0269272	c
T3	1.04167	1.1087	1.18636	1.11224	0.0724136	T3	1.1122	b	T3	1.1989	0.0267224	a
T4	1.2	1.17172	1.22513	1.19895	0.0267224	T4	1.1989	a	T4	1.1122	0.0724136	b
ФpsⅡ	ФpsⅡ			#DIV/0!	#DIV/0!	ФpsⅡ			ФpsⅡ
T1	0.626923	0.640152	0.632812	0.633296	0.00662744	T1	0.6333	b	T1	0.6571	0.00180206	a
T2	0.659091	0.656716	0.655556	0.657121	0.00180206	T2	0.6571	a	T2	0.6333	0.00662744	b
T3	0.570833	0.56087	0.545455	0.559052	0.0127866	T3	0.5591	c	T3	0.4668	0.0122461	d
T4	0.465	0.479798	0.455497	0.466765	0.0122461	T4	0.4668	d	T4	0.5591	0.0127866	c

## Sheet: Photosynthetic enzyme
RUBP				avg		sd
92.8566	93.5394	97.0996		94.4985	T2	2.27833	T1	94.4985	b		T1	105.648	3.42932	a
102.931	104.511	109.501		105.648	T1	3.42932	T2	105.648	a		T2	94.4985	2.27833	b					Treatment	Rubisco	FBA	FBP
74.7527	75.4215	73.7765		74.6502	T4	0.827282	T3	74.6502	c		T3	65.3484	4.66007	d						nmol·min-1·g-2	nmol·min-1·g-2	nmol·min-1·g-2
64.4897	70.3781	61.1774		65.3484	T3	4.66007	T4	65.3484	d		T4	74.6502	0.827282	c					T1	105.65±3.43a	155.81±13.38a	81.23±3.46b
																			T2	94.5±2.28b	162.17±6.07a	91.22±4.51a
																			T3	65.35±4.66d	116.65±4.33c	65.55±1.35c
FDA																			T4	74.65±0.83c	134.55±8.67b	76.4±3.26b
160.295	157.254	168.961		162.17	T2	6.07456	T1	162.17	a		T1	155.808	13.3762	a
160.26	160.134	137.029		155.808	T1	13.3762	T2	152.474	a		T2	162.17	6.07456	a
132.305	127.224	144.117		134.548	T4	8.66703	T3	134.548	b		T3	116.65	4.33087	c
115.311	113.146	121.492		116.65	T3	4.33087	T4	116.65	c		T4	134.548	8.66703	b
FBP
91.4941	95.5897	86.5822		91.222	T2	4.50992	T1	91.222	a		T1	81.2305	3.45626	b
80.4542	85.0089	78.2285		81.2305	T1	3.45626	T2	81.2305	b		T2	91.222	4.50992	a
72.8522	79.2565	77.0829		76.3972	T4	3.25672	T3	76.3972	b		T3	65.5474	1.35065	c
67.0187	65.2597	64.3637		65.5474	T3	1.35065	T4	65.5474	c		T4	76.3972	3.25672	b

## Sheet: Carbon metabolism
ss	umol·g-1·min·FW				AVG	SD						ss
	T1	0.826268	0.814451	0.814451	0.81839	0.00682252	T1	0.8184	a			T1	0.888416	0.0519643	a	0.89	0.052		0.89	0.052	±	0.89±0.052a				Treatment	SS	SPS	Reducing sugar	Sucrose	Amylum
	T2	0.924742	0.828894	0.911612	0.888416	0.0519643	T2	0.8884	a			T2	0.81839	0.00682252	a	0.82	0.007		0.82	0.007	±	0.82±0.007a					μmol·g-1·min-1	μmol·g-1·min-1	mg·g-1	mg·g-1	mg·g-1
	T3	0.549226	0.654265	0.662143	0.621878	0.063042	T3	0.6219	b			T3	0.52034	0.0126621	c	0.52	0.013		0.52	0.013	±	0.52±0.013c		0.41573		T1	0.89±0.052a	0.65±0.011b	46.32±0.73a	14.46±0.59a	323.89±2.68a
	T4	0.511149	0.515088	0.534783	0.52034	0.0126621	T4	0.5203	c			T4	0.621878	0.063042	b	0.62	0.063		0.62	0.063	±	0.62±0.063b		0.303371		T2	0.82±0.007a	0.73±0.008a	40.51±1.15b	12.31±0.35b	319.44±2.71a
SPS	SPS	umol·g-1·min·FW			AVG	SD						SPS	AVG	SD		#VALUE!	#VALUE!		#VALUE!	#VALUE!	±	#VALUE!				T3	0.52±0.013c	0.5±0.015d	22.35±1.05d	5.29±0.08d	147.92±5.12c
	T1	0.727793	0.735671	0.719915	0.727793	0.00787797	T1	0.7278	a			T1	0.650326	0.010504	b	0.65	0.011		0.65	0.011	±	0.65±0.011b				T4	0.62±0.063b	0.61±0.005c	30.08±0.64c	7.43±0.29c	221.94±7.87b
	T2	0.639822	0.66083	0.650326	0.650326	0.010504	T2	0.6503	b			T2	0.727793	0.00787797	a	0.73	0.008		0.73	0.008	±	0.73±0.008a
	T3	0.600433	0.610937	0.608311	0.60656	0.00546643	T3	0.6066	c			T3	0.496706	0.0149128	d	0.5	0.015		0.5	0.015	±	0.5±0.015d		0.230769
	T4	0.503271	0.50721	0.479637	0.496706	0.0149128	T4	0.4967	d			T4	0.60656	0.00546643	c	0.61	0.005		0.61	0.005	±	0.61±0.005c		0.0615385
																0	0		0	0	±	0±0
																0	0		0	0	±	0±0
																0	0		0	0	±	0±0
Reducing sugar				AVG	SD							Reducing sugar				0	0		0	0	±	0±0
T1	41.5364	40.7182	39.2636	40.5061	1.15112	T1	40.5061	b				T1	46.3242	0.734809	a	46.32	0.73		46.32	0.73	±	46.32±0.73a
T2	46.4455	46.9909	45.5364	46.3242	0.734809	T2	46.3242	a				T2	40.5061	1.15112	b	40.51	1.15		40.51	1.15	±	40.51±1.15b
T3	30.5364	30.3545	29.3545	30.0818	0.636364	T3	30.0818	c				T3	22.3545	1.04841	d	22.35	1.05		22.35	1.05	±	22.35±1.05d
T4	23.1727	21.1727	22.7182	22.3545	1.04841	T4	22.3545	d				T4	30.0818	0.636364	c	30.08	0.64		30.08	0.64	±	30.08±0.64c
Sucrose				AVG	SD							Sucrose	AVG	SD		#VALUE!	#VALUE!		#VALUE!	#VALUE!	±	#VALUE!
T1	12.6	12.4167	11.9167	12.3111	0.353684	T1	12.3111	b				T1	14.4611	0.589805	a	14.46	0.59		14.46	0.59	±	14.46±0.59a
T2	14.65	14.9333	13.8	14.4611	0.589805	T2	14.4611	a				T2	12.3111	0.353684	b	12.31	0.35		12.31	0.35	±	12.31±0.35b
T3	7.71667	7.45	7.13333	7.43333	0.292024	T3	7.43333	c				T3	5.28889	0.0751542	d	5.29	0.08		5.29	0.08	±	5.29±0.08d
T4	5.21667	5.28333	5.36667	5.28889	0.0751542	T4	5.28889	d				T4	7.43333	0.292024	c	7.43	0.29		7.43	0.29	±	7.43±0.29c
																0	0		0	0	±	0±0
																0	0		0	0	±	0±0
Amylum	mg/g				AVG		AVG	SD				Amylum				0	0		0	0	±	0±0
T1	319.583	316.667	322.083	T1	319.444	a	319.444	2.711				T1	323.889	2.67879	a	323.89	2.68		323.89	2.68	±	323.89±2.68a
T2	325.833	325	320.833	T2	323.889	a	323.889	2.67879				T2	319.444	2.711	a	319.44	2.71		319.44	2.71	±	319.44±2.71a
T3	213.333	223.75	228.75	T3	221.944	b	221.944	7.86533				T3	147.917	5.12009	c	147.92	5.12		147.92	5.12	±	147.92±5.12c
T4	153.75	145.833	144.167	T4	147.917	c	147.917	5.12009				T4	221.944	7.86533	b	221.94	7.87		221.94	7.87	±	221.94±7.87b

## Sheet: chlorophyll content
Treatment	Chlorophyll a	Chlorophyll b	Carotenoid	Chlorophyll a+b	Chlorophyll a/b	Root activity
T1	1.75±0.01c	0.71±0.0142c	0.73±0.0068c	2.54±0.017b	2.41±0.003b	64.84±1.36a
T2	1.76±0.01c	0.71±0.0102c	0.71±0.0115c	2.46±0.019c	2.48±0.027c	61.29±1.21b
T3	1.93±0.01a	0.99±0.0211a	0.79±0.0122a	2.92±0.013a	1.94±0.049a	47.37±0.62d
T4	1.8±0.01b	0.75±0.0049b	0.76±0.0166b	2.46±0.016c	2.47±0.053c	52.15±1.46c

## Sheet: Mineral elements
Mg				mg/g	mg/g	mg/g								Mg	mg/g
T1	0.917	0.914	0.875	15.2833	15.2333	14.5833	T1	15.0333	a	15.0333	0.390512		T1	12.9333	0.0666667	b
T2	0.776	0.772	0.780	12.9333	12.8667	13	T2	12.9333	b	12.9333	0.0666667		T2	15.0333	0.390512	a
T3	0.541	0.553	0.558	9.01667	9.21667	9.3	T3	9.17778	c	9.17778	0.145615		T3	8.72778	0.244002	c
T4	0.508	0.526	0.537	8.46667	8.76667	8.95	T4	8.72778	c	8.72778	0.244002		T4	9.17778	0.145615	c
K							avg	sd					K	mg/g
T1	27	28	29	26.9318	28.0915	29.2512	28.0915	1.15975	T1	28.0915	b		T1	31.1842	0.669582	a
T2	30	31	31	30.411	31.5707	31.5707	31.1842	0.669582	T2	31.1842	a		T2	28.0915	1.15975	b
T3	25	26	27	24.6123	25.772	26.9318	25.772	1.15975	T3	25.772	c		T3	22.6793	0.669582	d
T4	23	23	24	22.2927	22.2927	23.4525	22.6793	0.669582	T4	22.6793	d		T4	25.772	1.15975	c
Na	mg/g												Na	mg/g
T1	14	15	15	5.494	5.9865	5.9865	5.82233	0.284345	T1	5.82233	c		T1	5.65817	0.284345	c
T2	14	14	15	5.494	5.494	5.9865	5.65817	0.284345	T2	5.65817	c		T2	5.82233	0.284345	c
T3	18	19	20	7.464	7.9565	8.449	7.9565	0.4925	T3	7.9565	b		T3	11.404	0.4925	a
T4	25	26	27	10.9115	11.404	11.8965	11.404	0.4925	T4	11.404	a		T4	7.9565	0.4925	b
Ca													Ca	mg/g
T1	0.2826	0.2842	0.2852	18.7499	18.86	18.9289	18.8463	0.0902806	T1	18.8463	b		T1	19.4543	0.111283	a
T2	0.2943	0.2931	0.2911	19.5553	19.4727	19.335	19.4543	0.111283	T2	19.4543	a		T2	18.8463	0.0902806	b
T3	0.2521	0.2541	0.2555	16.6503	16.788	16.8844	16.7742	0.117631	T3	16.7742	c		T3	13.9909	0.158826	d
T4	0.2161	0.2118	0.2125	14.1722	13.8761	13.9243	13.9909	0.158826	T4	13.9909	d		T4	16.7742	0.117631	c
Fe				mg/g	mg/g	mg/g							Fe	mg/g
T1	0.086	0.082	0.083	1.43333	1.36667	1.38333	T1	1.39444	a	1.39444	0.0346944		T1	1.35	0.0666667	a
T2	0.081	0.085	0.077	1.35	1.41667	1.28333	T2	1.35	a	1.35	0.0666667		T2	1.39444	0.0346944	a
T3	0.051	0.049	0.049	0.85	0.816667	0.816667	T3	0.827778	b	0.827778	0.019245		T3	0.738889	0.0254588	c
T4	0.046	0.043	0.044	0.766667	0.716667	0.733333	T4	0.738889	c	0.738889	0.0254588		T4	0.827778	0.019245	b
										#DIV/0!	#DIV/0!
										#DIV/0!	#DIV/0!
Zn				mg/g	mg/g	mg/g				#DIV/0!	#DIV/0!		Zn	mg/g
T1	0.105	0.104	0.106	0.175	0.173333	0.176667	T1	0.175	a	0.175	0.00166667		T1	0.154444	0.00096225	b
T2	0.092	0.093	0.093	0.153333	0.155	0.155	T2	0.155	b	0.154444	0.00096225		T2	0.175	0.00166667	a
T3	0.075	0.071	0.069	0.125	0.118333	0.115	T3	0.119444	c	0.119444	0.00509175		T3	0.09	0.005	d
T4	0.054	0.051	0.057	0.09	0.085	0.095	T4	0.09	d	0.09	0.005		T4	0.119444	0.00509175	c
P	mg/g												P	mg/g
T1	2.2397	2.40927	2.68058	T1	2.44318	c	B	2.44318	0.222389				T1	5.80349	0.326652	a
T2	2.72297	3.33342	3.08755	T2	3.04798	b	B	3.04798	0.307143				T2	5.52653	0.188508	a
T3	5.30891	5.63957	5.6311	T3	5.52653	a	A	5.52653	0.188508				T3	2.44318	0.222389	c
T4	5.81762	6.12285	5.47	T4	5.80349	a	A	5.80349	0.326652				T4	3.04798	0.307143	b
N						avg	sd						N
T1	3.61	3.55	3.74	1.2635	1.2425	1.309	1.27167	0.0339939	T1	1.27167	a		T1	1.2845	0.0105	a
T2	3.64	3.67	3.7	1.274	1.2845	1.295	1.2845	0.0105	T2	1.2845	a		T2	1.27167	0.0339939	a
T3	3.23	3.25	3.31	1.1305	1.1375	1.1585	1.14217	0.0145717	T3	1.14217	b		T3	1.0745	0.014	c
T4	3.03	3.07	3.11	1.0605	1.0745	1.0885	1.0745	0.014	T4	1.0745	c		T4	1.14217	0.0145717	b

## Sheet: root activity
root activity(ug/h·g FW）	8-15								(ug/h·g FW）
T1	63.5653	64.7017	66.2642	1.35503	T1	64.8438	a		T1	64.8438	1.35503	a	64.84	1.36	64.84	1.36	±	64.84±1.36a
T2	61.4347	62.429	60.0142	1.21364	T2	61.2926	b		T2	61.2926	1.21364	b	61.29	1.21	61.29	1.21	±	61.29±1.21b
T3	50.9233	53.7642	51.7756	1.45784	T3	52.1544	c		T3	47.3722	0.619162	d	47.37	0.62	47.37	0.62	±	47.37±0.62d
T4	46.946	48.0824	47.0881	0.619162	T4	47.3722	d		T4	52.1544	1.45784	c	52.15	1.46	52.15	1.46	±	52.15±1.46c

## Sheet: Growth
	Plant height/cm		Stem thickness/mm		Leaf FW/g		Stem FW/g	Rhizome FW/g	Root FW/g
	29.88±0.74a		10.03±0.31b		16.53±0.83b		12.5±0.89a	17.93±0.65a	13.7±0.44b
	26.51±0.78b		8.31±0.28c		9.2±0.61c		9.83±0.59b	12.77±1.03b	10.03±0.5c
	31.43±1.15a		11.2±0.36a		18.93±0.45a		12.93±0.55a	18.57±0.76a	15.4±0.82a
	23.91±1.75c		6.7±0.82d		8.23±0.7c		8.87±0.95b	10.13±0.65c	9.23±0.42c
		Treatment	Plant height	Stem thickness	Leaf FW	Stem FW	Rhizome FW	Root FW
			cm	mm	g	g	g	g
		T1	31.43±1.15a	11.2±0.36a	18.93±0.45a	12.93±0.55a	18.57±0.76a	15.4±0.82a
		T2	29.88±0.74a	10.03±0.31b	16.53±0.83b	12.5±0.89a	17.93±0.65a	13.7±0.44b
		T3	23.91±1.75c	6.7±0.82d	8.23±0.7c	8.87±0.95b	10.13±0.65c	9.23±0.42c
		T4	26.51±0.78b	8.31±0.28c	9.2±0.61c	9.83±0.59b	12.77±1.03b	10.03±0.5c
